# Supplementary material for: Ergot Alkaloid Contents in Hybrid Rye are Reduced by Breeding
Source: MDPI journal article supplement (doi:10.3390/agriculture11060526), 2021-06-05
Supplement: s1 [file s1]

# Ergot alkaloid contents in hybrid rye are reduced by breeding

Miedaner T., Kodisch A., Raditschnig A., Eifler J.

## Supplementary Materials

**Table S1.** Means of anther score (1-9), ergot severity (%), and ergot alkaloid contents (mg/kg) measured by HPLC and ELISA of 15 single-cross hybrids across all environments and the test environments after inoculation by *Claviceps purpurea*

| Hybrid | All environments (N=11) |   |                    |     | Test environments (N=2) |    |                    |    |                         |    |                          |     |
|--------|-------------------------|---|--------------------|-----|-------------------------|----|--------------------|----|-------------------------|----|--------------------------|-----|
|        | AS (1-9)                |   | Ergot severity (%) |     | AS (1-9)                |    | Ergot severity (%) |    | EA content HPLC (mg/kg) |    | EA content ELISA (mg/kg) |     |
| K2     | 3.55                    | c | 3.74               | a   | 2.00                    | de | 11.47              | a  | 45.27                   | a  | 75.82                    | bcd |
| K5     | 3.50                    | c | 3.29               | a   | 1.75                    | de | 6.76               | b  | 16.35                   | b  | 88.48                    | abc |
| K4     | 3.23                    | c | 2.37               | b   | 1.50                    | e  | 5.12               | bc | 17.27                   | b  | 126.99                   | a   |
| K3     | 3.68                    | c | 2.01               | b   | 3.00                    | cd | 4.16               | c  | 11.28                   | c  | 133.09                   | a   |
| K15    | 5.36                    | b | 1.11               | c   | 4.00                    | bc | 3.09               | e  | 9.99                    | c  | 112.99                   | ab  |
| K14    | 5.82                    | b | 0.66               | cde | 4.75                    | b  | 1.63               | e  | 6.48                    | de | 51.29                    | cde |
| K12    | 7.27                    | a | 0.97               | cd  | 8.25                    | a  | 0.57               | e  | 1.51                    | ef | 18.30                    | e   |
| K17    | 7.12                    | a | 0.46               | de  | 7.75                    | a  | 0.54               | e  | 1.02                    | ef | 28.40                    | de  |
| K7     | 7.27                    | a | 0.46               | de  | 8.25                    | a  | 0.44               | e  | 5.25                    | ef | 32.64                    | de  |
| K18    | 7.36                    | a | 0.53               | cde | 7.50                    | a  | 0.43               | e  | 1.72                    | ef | 43.67                    | cde |
| K20    | 6.87                    | a | 0.33               | e   | 7.75                    | a  | 0.39               | e  | 2.25                    | ef | 27.06                    | de  |
| K19    | 7.05                    | a | 0.39               | de  | 7.25                    | a  | 0.37               | e  | 1.54                    | ef | 27.28                    | de  |
| K10    | 7.36                    | a | 0.44               | de  | 7.75                    | a  | 0.31               | e  | 1.91                    | ef | 55.85                    | cde |
| K8     | 7.27                    | a | 0.49               | de  | 8.00                    | a  | 0.25               | e  | 0.57                    | f  | 20.94                    | de  |
| K9     | 7.32                    | a | 0.31               | e   | 7.75                    | a  | 0.22               | e  | 0.92                    | ef | 22.13                    | e   |
| Mean   | 6.00                    |   | 1.17               |     | 5.82                    |    | 2.38               |    | 8.22                    |    | 57.66                    |     |

**Table S2.** Ergot severity (%) and individual and total ergot alkaloid contents (mg/kg) measured by HPLC of 15 hybrids across two environments

| Geno-<br>type | Ergot<br>severity<br>(%) | Ergot alkaloid content HPLC (mg/kg) |                   |              |                |                |                  |                 |                   |                            |                              |                  |                    | Total |
|---------------|--------------------------|-------------------------------------|-------------------|--------------|----------------|----------------|------------------|-----------------|-------------------|----------------------------|------------------------------|------------------|--------------------|-------|
|               |                          | Ergo-<br>metrin                     | Ergo-<br>metrinin | Ergo-<br>sin | Ergo-<br>sinin | Ergo-<br>tamin | Ergo-<br>taminin | Ergo-<br>cornin | Ergo-<br>corninin | $\alpha$ -Ergo-<br>cryptin | $\alpha$ -Ergo-<br>cryptinin | Ergo-<br>cristin | Ergo-<br>cristinin |       |
| K2            | 3.74                     | 1.79                                | 0.27              | 1.09         | 0.28           | 8.93           | 1.35             | 3.23            | 0.66              | 5.45                       | 1.19                         | 18.20            | 2.82               | 45.27 |
| K5            | 3.29                     | 0.80                                | 0.09              | 0.56         | 0.14           | 2.06           | 0.44             | 1.81            | 0.37              | 3.30                       | 0.67                         | 5.45             | 0.67               | 16.35 |
| K4            | 2.37                     | 0.94                                | 0.16              | 0.52         | 0.15           | 2.51           | 0.47             | 1.33            | 0.30              | 2.68                       | 0.69                         | 6.69             | 0.84               | 17.27 |
| K3            | 2.01                     | 0.56                                | 0.08              | 0.35         | 0.10           | 1.67           | 0.32             | 0.72            | 0.15              | 1.64                       | 0.41                         | 4.53             | 0.75               | 11.28 |
| K15           | 1.11                     | 0.41                                | 0.06              | 0.30         | 0.06           | 1.55           | 0.40             | 0.92            | 0.16              | 1.38                       | 0.24                         | 4.07             | 0.44               | 9.99  |
| K12           | 0.97                     | 0.08                                | 0.00              | 0.09         | 0.02           | 0.18           | 0.04             | 0.38            | 0.08              | 0.34                       | 0.07                         | 0.21             | 0.02               | 1.51  |
| K14           | 0.66                     | 0.47                                | 0.11              | 0.27         | 0.08           | 1.08           | 0.22             | 0.63            | 0.17              | 1.06                       | 0.30                         | 1.87             | 0.23               | 6.48  |
| K18           | 0.53                     | 0.17                                | 0.02              | 0.09         | 0.02           | 0.19           | 0.04             | 0.17            | 0.04              | 0.35                       | 0.09                         | 0.48             | 0.07               | 1.72  |
| K8            | 0.49                     | 0.04                                | 0.00              | 0.02         | 0.00           | 0.17           | 0.03             | 0.04            | 0.01              | 0.09                       | 0.03                         | 0.12             | 0.02               | 0.57  |
| K17           | 0.46                     | 0.08                                | 0.00              | 0.05         | 0.01           | 0.11           | 0.03             | 0.13            | 0.02              | 0.28                       | 0.06                         | 0.21             | 0.03               | 1.02  |
| K7            | 0.46                     | 0.20                                | 0.05              | 0.08         | 0.01           | 1.10           | 0.30             | 0.11            | 0.03              | 0.26                       | 0.05                         | 2.73             | 0.33               | 5.25  |
| K10           | 0.44                     | 0.31                                | 0.11              | 0.14         | 0.04           | 0.06           | 0.00             | 0.22            | 0.06              | 0.73                       | 0.16                         | 0.07             | 0.01               | 1.91  |
| K19           | 0.39                     | 0.14                                | 0.02              | 0.11         | 0.03           | 0.07           | 0.02             | 0.37            | 0.10              | 0.42                       | 0.12                         | 0.13             | 0.02               | 1.54  |
| K20           | 0.33                     | 0.13                                | 0.02              | 0.16         | 0.05           | 0.12           | 0.02             | 0.60            | 0.13              | 0.57                       | 0.16                         | 0.25             | 0.03               | 2.25  |
| K9            | 0.31                     | 0.07                                | 0.00              | 0.04         | 0.01           | 0.14           | 0.04             | 0.07            | 0.01              | 0.13                       | 0.03                         | 0.37             | 0.04               | 0.92  |
